# Supplementary material for: Venus Kinase Receptors Control Reproduction in the Platyhelminth Parasite Schistosoma mansoni
Source: PubMed Central journal article supplement (PMC4038586; doi:10.1371/journal.ppat.1004138), 2014-05-29

**A**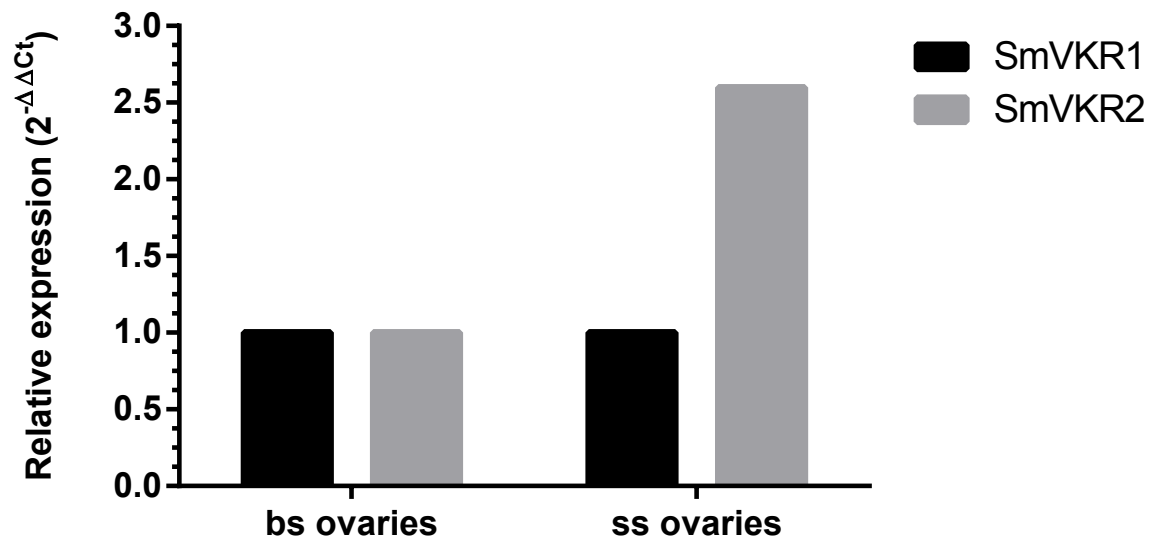**B**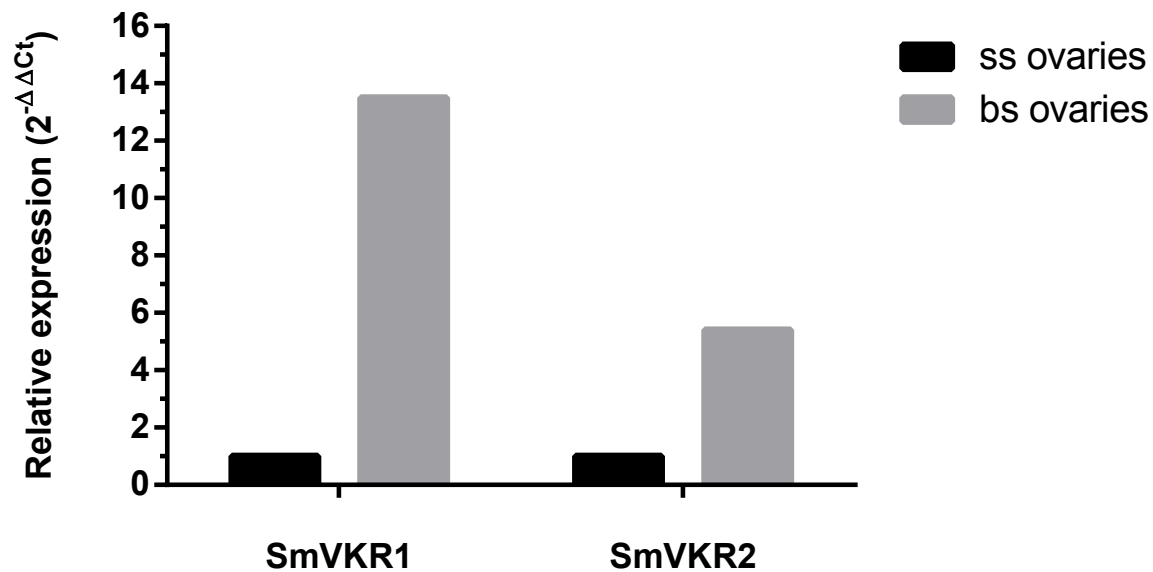

Supplement: ppat.1004138.s002.pdf [file ppat.1004138.s002.pdf]
