# Supplementary material for: Venus Kinase Receptors Control Reproduction in the Platyhelminth Parasite Schistosoma mansoni
Source: PubMed Central journal article supplement (PMC4038586; doi:10.1371/journal.ppat.1004138), 2014-05-29

|                          |          |          |          |          |          |          |          |          |          |
|--------------------------|----------|----------|----------|----------|----------|----------|----------|----------|----------|
| <b>Progesterone</b>      | <b>+</b> | <b>+</b> | <b>+</b> | <b>-</b> | <b>-</b> | <b>-</b> | <b>-</b> | <b>-</b> | <b>-</b> |
| <b>Insuline</b>          | <b>-</b> | <b>-</b> | <b>-</b> | <b>+</b> | <b>+</b> | <b>+</b> | <b>-</b> | <b>-</b> | <b>-</b> |
| <b>SmVKR1</b>            | <b>-</b> | <b>-</b> | <b>-</b> | <b>-</b> | <b>-</b> | <b>-</b> | <b>+</b> | <b>+</b> | <b>+</b> |
| <b>L-Arginine (1μM)</b>  | <b>-</b> | <b>-</b> | <b>-</b> | <b>-</b> | <b>-</b> | <b>-</b> | <b>+</b> | <b>+</b> | <b>+</b> |
| <b>Purvanalol (20μM)</b> | <b>-</b> | <b>+</b> | <b>-</b> | <b>-</b> | <b>+</b> | <b>-</b> | <b>-</b> | <b>+</b> | <b>-</b> |
| <b>SP600125 (100μM)</b>  | <b>-</b> | <b>-</b> | <b>+</b> | <b>-</b> | <b>-</b> | <b>+</b> | <b>-</b> | <b>-</b> | <b>+</b> |

**JNK**

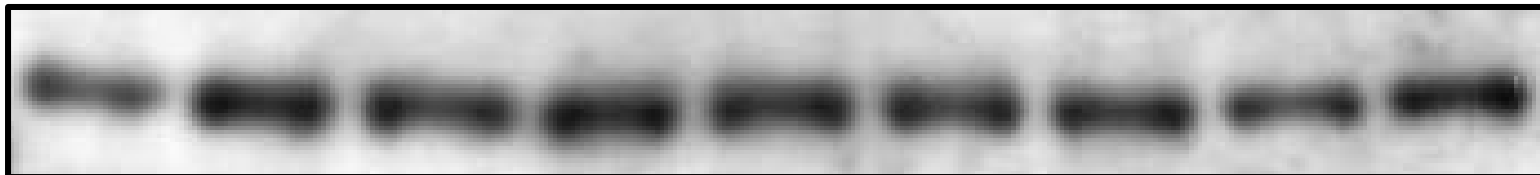

**Phospho-JNK**

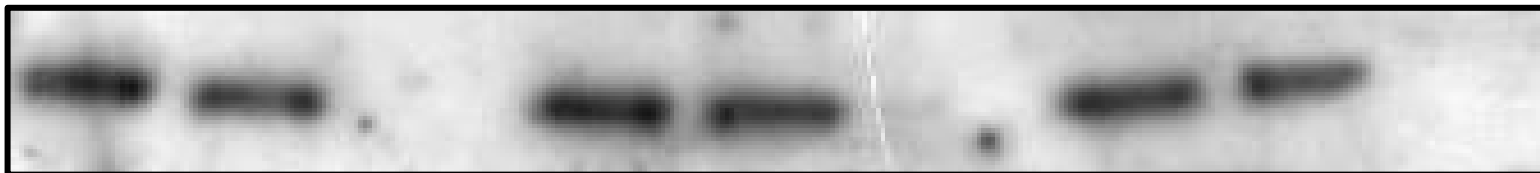

Supplement: ppat.1004138.s003.pdf [file ppat.1004138.s003.pdf]
