# Supplementary material for: Venus Kinase Receptors Control Reproduction in the Platyhelminth Parasite Schistosoma mansoni
Source: PubMed Central journal article supplement (PMC4038586; doi:10.1371/journal.ppat.1004138), 2014-05-29
Supplement: ppat.1004138.s004.pdf [file ppat.1004138.s004.pdf]

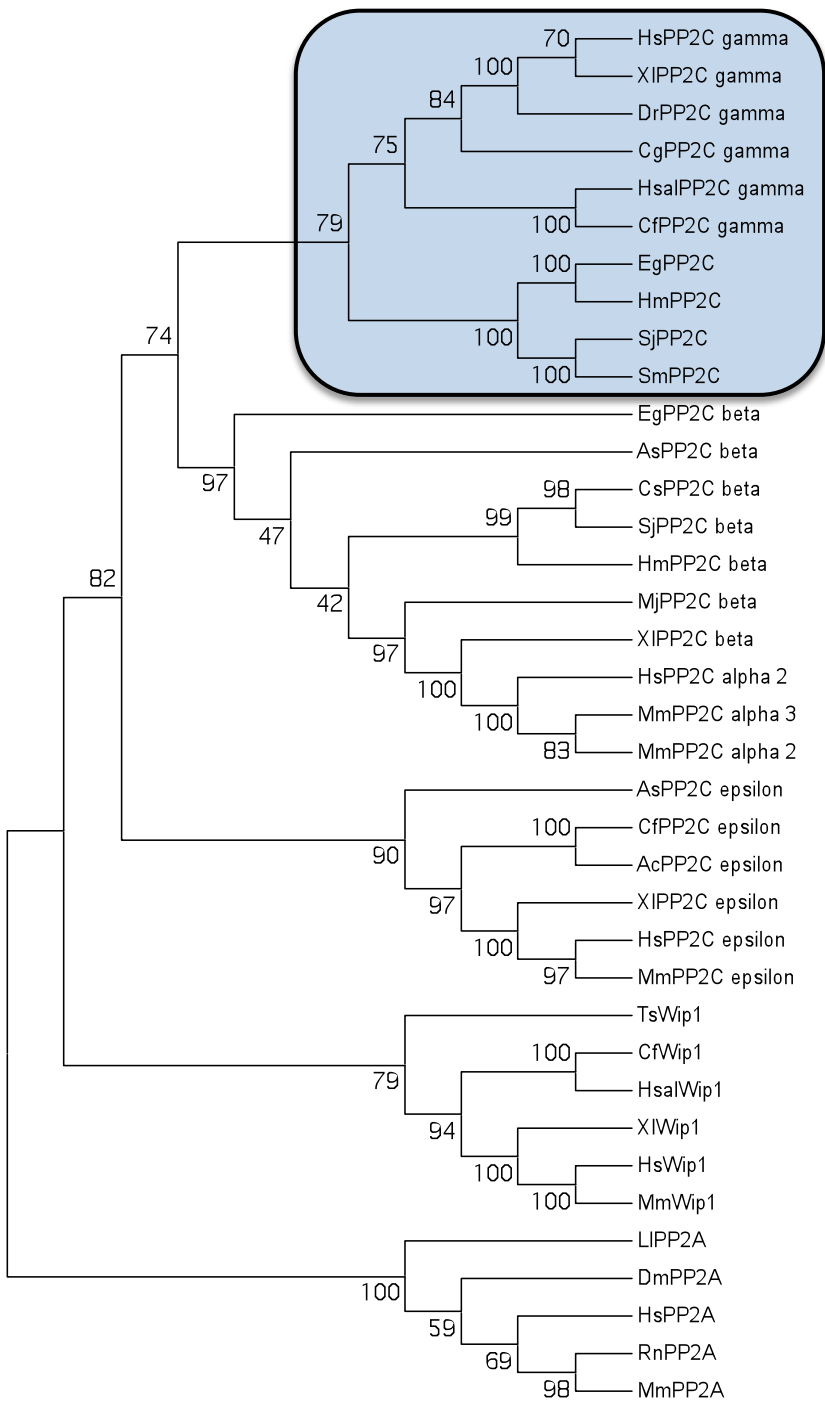

**PPM1G/PP2C  
gamma**

**PPM1B/PP2C  
beta**

**PPM1A/PP2C  
alpha**

**PPM1L/PP2C  
epsilon**

**PPM1D/Wip1**

**outgroup**
