# Supplementary material for: Venus Kinase Receptors Control Reproduction in the Platyhelminth Parasite Schistosoma mansoni
Source: PubMed Central journal article supplement (PMC4038586; doi:10.1371/journal.ppat.1004138), 2014-05-29
Supplement: ppat.1004138.s006.pdf [file ppat.1004138.s006.pdf]

| AA (1mM) | GVBD (%) |        |        |
|----------|----------|--------|--------|
|          | PG       | SmVKR1 | SmVKR2 |
| Ala      | 100      | 100    | 0      |
| Arg      | 80       | 100    | 100    |
| Asn      | 100      | 0      | 0      |
| Asp      | 100      | 0      | 0      |
| Cys      | 80       | 80     | 90     |
| Gln      | 90       | 0      | 0      |
| Glu      | 100      | 100    | 0      |
| Gly      | 90       | 80     | 0      |
| His      | 100      | 0      | 0      |
| Ile      | 100      | 0      | 0      |
| Leu      | 100      | 0      | 0      |
| Lys      | 100      | 0      | 0      |
| Met      | 90       | 0      | 0      |
| Phe      | 100      | 0      | 0      |
| Pro      | 100      | 0      | 0      |
| Ser      | 100      | 90     | 0      |
| Thr      | 100      | 100    | 90     |
| Trp      | 90       | 0      | 80     |
| Tyr      | 100      | 0      | 0      |
| Val      | 100      | 0      | 0      |
