# Supplementary material for: Venus Kinase Receptors Control Reproduction in the Platyhelminth Parasite Schistosoma mansoni
Source: PubMed Central journal article supplement (PMC4038586; doi:10.1371/journal.ppat.1004138), 2014-05-29
Supplement: ppat.1004138.s007.pdf [file ppat.1004138.s007.pdf]

| Name          | Primer Sequence                                        |
|---------------|--------------------------------------------------------|
| SmVKR1HISF    | 5'-CTGGTGATCCGTCTCCAAGT-3'                             |
| SmVKR1HISR    | 5- AAACGTATGGCCACAGGAAG-3'                             |
| SmVKR2HISF    | 5'-GGACCAACAACAACAATCGTATGATCC-3'                      |
| SmVKR2HISR    | 5'-CGAGGCATATCTAAATCAGCCAATTCTG-3'                     |
| SmVKR1RNAiF   | 5- GGA CTCAAATTCACCCACCCCCTCATGTC-3'                   |
| SmVKR1RNAiFT7 | 5'-TAATACGACTCACTATAGGGAGACACCCACCCCCTCATGTC-3'        |
| SmVKR1RNAiR   | 5'-GATTGACATGACAGGAGATGAAG-3'                          |
| SmVKR1RNAiRT7 | 5'-TAATACGACTCACTATAGGGAGAGACATGACAGGAGATGAAG-3'       |
| SmVKR2RNAiF   | 5'-GTCTACATACCTGCGAACTACC-3'                           |
| SmVKR2RNAiFT7 | 5'-TAATACGACTCACTATAGGGTACTGTCTACATACCTGCGAACTACC-3'   |
| SmVKR2RNAiR   | 5'-GACTAACGGGTGCAACAGTTGAGC-3'                         |
| SmVKR2RNAiRT7 | 5'-TAATACGACTCACTATAGGGTACTGACTAACGGGTGCAACAGTTGAGC-3' |
| SmVKR1qPCRF   | 5'- AGACATTGATATTCCACCTGCC-3'                          |
| SmVKR1qPCRR   | 5'-AACGCCATTACGCTTCG-3'                                |
| SmVKR2qPCRF   | 5'- CATTACCTTTTCAACCAACTGTGG-3'                        |
| SmVKR2qPCRR   | 5'-TTCTGATATTATACAAGTGTCC-3'                           |
| SmVKR2qPCRF2  | 5'-CAGATTGCATTGACCATTC-3'                              |
| SmVKR2qPCRR2  | 5'-TCGTACGAAAACCACCAACAC-3'                            |
| Actinq2F      | 5'-GGAAGTTCAAGCCCTTGTTG-3'                             |
| Actinq2R      | 5'-TCATCACCGACGTAGCTGTC-3'                             |
| SmVKR1S466AF  | 5'-GATCGCTGCTCTGTGTGCGGATTCAATAGAACC-3'                |
| SmVKR2S410AF  | 5'-CTATCGCTGCTCTATGCGCAGACTCTATAGAGGCTG-3'             |
